# Supplementary material
Source: publisher figshare collection journal article supplement (https://gsapubs.figshare.com/ndownloader/files/30837367)
Supplement: Supplementary file 1 [file 30837367]

## Sheet: Database
LOCALITY		W	N	AGE	FORMATION	MEMBER	LITHOFACIES	THICKNESS	LOWER CONTACT	UPPER CONTACT	ENVIRONMENT	AUTHOR	REMARKS
Turipache-1	Well			Middle Cretaceous	Cantelha		Wackstones, packstones, and dolomites.	NA			Inner platform (lagoon)	Alazaga-Ruiz, 1997
Trinitaria-1	Well			Middle Cretaceous	Cantelha		Wackstones, packstones, and dolomites.	NA			Inner platform (lagoon)	Alazaga-Ruiz, 1997
Rio Negro	Section			Middle Cretaceous (Albian)	Cantelha		Wackstones, grainstones, and dolomites	NA	Unidad arenosa (San Ricardo)		Lagoon	Alazaga-Ruiz, 1997
Malpaso-2	well			Early Cretaceous	Unidad Calcárea II		Pelagic fauna mixed with corals, molusca, and echinoids bioclasts.				Slope	Alazaga-Ruiz, 1997
Grama-1	Well			Aptian	Unidad Calcárea II		calcareous mudstone rich in clay, fossil-rich packstone and wackestone partially dolomitic. Planktonic fauna (Nannocus steinmanni). To the top biomicrites with radiolaria.	370 m	Neocomian beds		Slope to basinal	Alazaga-Ruiz, 1997
Rio Negro	Section			Late Cretaceous (Campanian-Maastrichtian)	Ocozocuautla		Shales laminated, siltstones, coarse to fine-grained sandstones, interbedded with bioclastic packstones. The packstones have sand grains. Common macrofauna corresponds to gastropods, pelecipds, algae, and wood.	NA	Cantelha		Deltaic (debris flow facies, clastic platform)	Alazaga-Ruiz, 1997
Grama-1	Well			Late Cretaceous	Unidad Calcárea II		calcareous mudstone rich in clay, fossil-rich packstone and wackestone partially dolomitic. Planktonic fauna.	690 m	Unidad Calcarea II		Basinal	Alazaga-Ruiz, 1997	rock types is very similar to Middle Cretaceous interval. The only change is on the biostratigraphy.
Oxchuc		92.287	16.872	Maastrichtian	Angostura		Limestone dolomite unit mith mudstones (Chubbina jamaicencis, miliolids and rotalids), foraminiferal packstone, bioclastic dolomites, fine dolomites with sufates pseudomorphs, grainstones with rudists.	213 m	unknown	bioclastic limestone with hexacorals -Lacandon Fm.	Lagoonal and supratidal	Cros et al., 1998	Ox U1-U3 Much more dolomitic and inner platform, stability of the platform changing from restricted to open lagoonal
La Trinitaria		92.063	16.068	Maastrichtian	Angostura		U1: Dolomitic facies with dissolution of bioclasts, early cementation, pedologic nodules, limestone with miliolids; calcareous marls with foraminifera; dolomitic limestone with pedologic features, bioturbated limestone (stacking pattern of regressing-transsgresive succession). U2: Upper bioclastic limestone with rudists and large foraminifera, bioturbated marly beds.	120 m	Sierra Madre?	Xochitlan Fm	Peritidal to continental-subtidal to peritidal. Inner platform invaded by terrigenous influx of deltaic lobe (U1) then the progressive opening of the platform (U2)	Cros et al., 1998	T U1-U2
Bajucu		92.07	16.457	Maastrichtian	Angostura		Massive grainstone-packstone with miliolids and foraminifera, abraded bioclasts, dolomitic limestone with echinoids and rudists clasts.	55 m	Sierra Madre?	Xochitlan Fm		Cros et al., 1998	B U2
Piedra Parada		93.512	16.762	Aptian-Albian	Sierra Madre	Dolomitic member	From bottom to top: dolomite+fluvial sandstone, karstic breccia, peritidal sequences with stromatolitic and breccia interbeds, subtidal sequences and tempestites, supratidal dolomites, bioclastic packstones and stromatolitic mudstones with pseudomorphs after sulfate.	ca. 550 m	Fluvial San Ricardo	Limestone member	Alluvial ﬂood-plain of San Ricardo evolved to coastal restricted lagoon to a inner platform - open lagoon.	Cros et al., 1998	Units PP U1 and U2
Piedra Parada		93.512	16.762	Late Albian-Cenomanian, PP U3-U5	Sierra Madre	Limestone member	Partially dolomitized limestone with red algae, milliolids and ostracods packstone, peritidal limestone with scarce planktonic fauna, packstone to floatstone of hexacorals, equinoderms, grainstones with corals and chert	533 m	Dolomitic	Ocozocuautla Fm. (Campanian)	Peritidal lagoon to supratidal restricted lagoon	Cros et al., 1998	Units PP U3 to U8 Equivalento to Cintalapa from Montes de Oca. U3 = hyposaline lagoon, peritidal lagoon, open lagoon. U4 = subtidal lagoon. U5 = bioclastic, regressive.
Piedra Parada		93.512	16.762	Turonian-Santonian, PP U8	Sierra Madre	Limestone member	Limestones and argillaceous interbeds, bioclastic limestones with mixed pelagic and benthic foraminifera, rudists limestones with Dicyclina schlumbergeri, limestones rich in large and partly siliciﬁed rudists	60 m	Cenomanian part of limestone member	Ocozocuautla Fm. (Campanian)	Open platform	Cros et al., 1998
Julian Grajales		92.968	16.397	Upper Aptian-Albian	Sierra Madre	Dolomitic	dolomite with Orbitolina Texana	150 m	San Ricardo			Cros et al., 1998
Julian Grajales		92.968	16.397	Cenomanian	Sierra Madre	Limestone-Dolomite	Fine bioclastic limestone, mudstone and packstone, laminated cherts, sulphates pseudomorphs, sponge spicules. Bioclastic (oyster, corals, gastropods, rudists) to dolomitic limestones, green argillaceous layers, dedolomitizacion, silicified rudists.	180 m		Hemipelagic Jolpabuchil	Supratidal to restricted lagoonal. To the upper part oppening of the inner platform.	Cros et al., 1998	Jg U1-U3
Guadalupe Victoria		93.137	16.453	GV U1c Upper Aptian-Albian	Sierra Madre	Dolomitic	Oolitic dolomitic limestone, calcareous marls with orbitolina, stromatolitic beds. Orbitolina texana	180 m	Pelitic San Ricardo	Limestone member	Subtidal	Cros et al., 1998	GV U1a-1d
Guadalupe Victoria		93.137	16.453	Cenomanian ?-Senonian (Turonian-Santonian)	Sierra Madre	Limestone	Foraminiferal mudstone, bioclastic rudist-oyster limestone, bioclastic cherty beds, stromatolitic limestones, packstone with rudist fragments (Dicyclina sp.).	120 m	Limestone-dolomite	Upper contact not exposed (with Jolpabuchil)	Peritidal inner platform, outer platform.	Cros et al., 1998	GV U4
Guadalupe Victoria		93.137	16.453	Albian to cenomanian	Sierra Madre	Limestone-Dolomite	Peritidal limestones and dolomites with sulfates pseudomorphs, silicified rudists and stromatolites, rudists packstone, karstic breccias. Abundance of shells, pelecipods. Thin bedded dolomites, laminated chert with sponges spicules, massive dolomite with chert nodules and rudist fragments, bioclastic limestone.	140 m	Dolomitic	Limestone member	Lower: Quiet water inner platform from subtidal to supratidal with restricted water circulation. Upper: Subtidal restricted quiet water deep enough to develop euxinic bottom.	Cros et al., 1998	Gv U2-U3. The platform in this area show periodical fluctuation in the tidal to supratidal level. Not open marine waters influx.
Tuxtla Gutierrez Area				Campanian	Sierra Madre	Upper Limestone	limestones with Dicyclina sp., beds affected by early lithification and oxidation, incipient hard ground. Floatstone with fragments of hexacorals and rudists affected by early lithification, dissolution of corals. Overlain by marly limestones rich in Globotruncana (Jolpabuchil)	not specified	Lower limestone member	Hemipelagic Jolpabuchil	Open platform	Cros et al., 1998	Simmilar to PP U8 (Suchiapa formation of Michaud)
La Trinitaria		92.063	16.068	Santonian to Campanian	Sierra Madre	Limestone-Dolomite	Mudstone with dissolution, bioclastic limestones with rudist fragments, milliolds, dissication cracks, dolomitic limestone with rudist and hexacorals fragments. Karstic features, Nummoculina sp.	215 m			Inner platform, supratidal to basal subtidal.	Cros et al., 1998	Similar to JG, there is not euxinic beds, or hemipelagic input
Bajucu		92.07	16.457	Campanian	Sierra Madre		crystalline limestone to dolomite with miliolids and rotalids, limestones, mudstones with ostracods	15 m	unknown	Angostura	Inner platform	Cros et al., 1998	B U1
Bajucu		92.07	16.457	Paleocene	Xochitlan		Bioclastic packstones with hexacorals in growth position, and bioclastic breccias with weathered and reworked limestone clasts, finning upward breccia beds with matrix rich in benthic and pelagic foraminifera and sponge spicules.	30 m	Angostura?	unknown	Slope	Cros et al., 1998	B U3-U4
Actela	Section	89.4869	16.0355	Maastrichtian-Paleocene (Lower breccia Maastrichtian reworkeed fauna, Upper breccia Early Danian) (eugubina Zone, Keller, 1988)	Actelá		Rudist packstones to wackestones with foraminifera (Accordiella conica, Chubbina jamaicensis, Cuneolina sp., Fleuryana adriatica, Kathina jamaicensis, Praealveolina sp., Sulcoperculina globosa); graded limestone breccias with rudist-rich limestone clasts up to 70 cm diameter and no matrix; graded limestone breccia with clasts 12 cm maximum diameter with lime-mudstone matrix with planktic foramini…	50-15 m	Erosional over Lower Angostura (rudist limestone)	Sepur Formation (marls, clays and wackestones)	Impact wave deposits by Chixculub impact (Hildebrand et al. (1993), or a response of multiple events (Keller and Stinnesbeck (1996).	Fourcade et al., 1999	Type section defined by Fourcade et al., 1999
Sierra de Chinaja	Section	90.262	15.96	Campanian-Maastrichtian (based on Biradiolites sp.)	Angostura		Yellowish grey rudist packstones, grainstones and wackestones with radiolitids (Biradiolites sp.) and numerous bentic foraminifera. The upper part contains Chubbina jamaicensis	350 m	Cobán A		outter carbonate platform, with large benthic foraminifera and rudists build-ups.	Fourcade et al., 1999	In Southern Petén Basin, the Campanian-Maastrichtian carbonate platform can be correlated with the siliciclastic deposits of the lower part of the Sepur Formation that accumulated in a foredeep basin in central Guatemala
San Diego-1	well	90.1864	16.0322	Upper Campanian - Maastrichtian	Angostura		Shallow water packstones and mudstones bearing rudists. Fossils include Accordiella, Chubbina, Pseudorbitoides	700 m	Cobán A	Sepur	Shallow water carbonate platform	Fourcade et al., 1999
Montaña de Rubelsanto	Section	90.4632	15.9796	Campanian-Maastrichtian	Angostura		From base to top: Rudists and foraminifera packstone with Diversocallis undulatus algae (50 m); bioclastic packstone (100 m); 175 m packstone with large foraminifera, rotalidaes and dasyclads algae (Accordiella conica, Chubbina jamaicensis, Cuneolina pavonia, Dicyclina schlumbergeri, Praealveolina sp. Praerhapydionina cubana, Pseudonummoloculina irregularis and Rotalidae, Acroporella chiapasis, M…	325 m	Cobán A		outter carbonate platform, with large benthic foraminifera and rudists build-ups.	Fourcade et al., 1999	In Southern Petén Basin, the Campanian-Maastrichtian carbonate platform can be correlated with the siliciclastic deposits of the lower part of the Sepur Formation that accumulated in a foredeep basin in central Guatemala
El Ceibo	Section	90.1971	15.9931	uppermost Maastrichtian	Angostura		White limestones with rudists and formaminifera Accordiella conica, Chubbina jamaicensis, Praealveolina sp. Hardground to the top	30 m		Sepur Formation (early Danian)	outter carbonate platform, with large benthic foraminifera and rudists build-ups.	Fourcade et al., 1999	In Southern Petén Basin, the Campanian-Maastrichtian carbonate platform can be correlated with the siliciclastic deposits of the lower part of the Sepur Formation that accumulated in a foredeep basin in central Guatemala
San Roman-1	well	90.2769	16.1865	Cenomanian	Cobán	B	From base to top: Carbonates with Cuneolina sp. and dolomites; dolomites, mudstones with ostracoda and anhydrites; crystalline limestones, wackstones with pelagic crinoids (Roveacrinidae) and foraminifera; anhydrite with dolomites and limestones with crinoids and planktic foraminifera as Heterohelicidae and Praeglobotruncana gibba Klaus; dolomites and mudstones; anhydrites and limestones; crystal…	1305 m	Cobán C	Erosional surface-Cobán A	Shallow water carbonates and sabkha with two platform-drowning events	Fourcade et al., 1999	Thickness es very variable from 1350 in San Roman-1 to completille eroded in Huapac-1 and Tzuncal-1. Age estimated by presence of plaktic foraminifera.
El Caribe-1	well	90.2521	16.0677	uppermost Maastrichtian	Angostura		Rudist limestones	400 m	Cobán A (Crystalline dolomites)	K-Pg breccias; Sepur Formation (Danian)	outter carbonate platform, with large benthic foraminifera and rudists build-ups.	Fourcade et al., 1999	In Southern Petén Basin, the Campanian-Maastrichtian carbonate platform can be correlated with the siliciclastic deposits of the lower part of the Sepur Formation that accumulated in a foredeep basin in central Guatemala
San Diego-1	well	90.1864	16.0322	Aptian-Cenomanian (Archila et al., 1990)	Cobán	C	From bottom to top: anhydrite, dolomites with solenoporis, miliolids, and Cuneolina sp; wacksestones and ackstones with Orbitolina sp., miliolids, echinoderm fragments, ooid grainstones; limestones, dolomites, anhydrite (Mactun unit with Opthalmidium sp., miliolids and cf. Nummoloculina heimi Bonet); anhydrite, clays, dolomites and lime-mudstones; bioclastic grainstonespackstones and dolomites, w…	2000 m	Cobán D	Cobán B	Shallow water carbonates, sabka, evaporite dominated.	Fourcade et al., 1999	Type section in well within the interval from 3927.9 m to 1930 m; unit 1 to Unit 6. Age determined by stratigraphic position, no index fossils.
San Diego-1	well	90.1864	16.0322	Barremian–Aptian (Archila et al., 1990)	Cobán	D	From Bottom to top: lime-mudstones with Choffatella decipiens, Hedbergella sp., Orbitolina sp.; Oolitic limestones with rare miliolids; Lime-Mudstone with planktic foraminifera; Lime-mudstones and wackestones with Orbitolina sp., echinoderm fragments and Neotrocholina sp.	1000 m	Todos Santos Fm.	Cobán C	Drownned shallow carbonate platform, anoxic, relatively deep basin. Reestablishment of shallow carbonate platform with Orbitolina and echinoderms.	Fourcade et al., 1999	Type section in well within the interval from 4836 m to 3927 m. Unit 1 to Unit 4
Rubelsanto-3	well	90.3511	15.9512	Turonian-Coniacian (Wug et al., 1995) Age is not reliable due to downhole contaminants.	Cobán	A	Limestones, pelletoidal dolomitised limestones, dolomites, sparce breccia and conglomerate.	700 m	Erosional emersion surface		After a Turonian emersion event, a shallow carbonate platform was developed.	Fourcade et al., 1999	Type section (Wug et al., 1995)
Rubelsanto-3	well	90.3511	15.9512	Turonian-Coniancian	Cobán	B	Massive anhydrites, carbonates and clay (Wug et al., 1995)	974 m	Cobán C	Erosional surface-Cobán A	Shallow water carbonates and sabkha; outer shelf and deep intrashelf.	Fourcade et al., 1999	Type section for Cobán B.
El Caribe	Section	90.2521	16.0677	uppermost Maastrichtian	Angostura		Upper part of the Formation. White limestones with rudist framgnets, bentic foraminifera Chubbina sp., and dasyclad algae.	> 150 m	Cobán A		outter carbonate platform, with large benthic foraminifera and rudists build-ups.	Fourcade et al., 1999	In Southern Petén Basin, the Campanian-Maastrichtian carbonate platform can be correlated with the siliciclastic deposits of the lower part of the Sepur Formation that accumulated in a foredeep basin in central Guatemala
Montaña de Rubelsanto	Section	90.4632	15.9796	Turonian-santonian (No well constrained)	Cobán	A	Dolomites, lime-mudstones with Discorbidae, rudist limestones.	800 m	Erosional emersion surface	Emersion surface	Shallow carbonate platform with emersion to the top.	Fourcade et al., 1999
b	Well	90.4827	16.4455	Barremian–Aptian (Archila et al., 1990)	Cobán	D	pelagic limestones with early Aptian planktic foraminifera near the base.			Cobán C	Drownned shallow carbonate platform, anoxic, relatively deep basin. Reestablishment of shallow carbonate platform with Orbitolina and echinoderms.	Fourcade et al., 1999
Bolonkitu-1	well	90.7231	15.5367	Mid-Albian	Cobán	C	Mactun unit: large foraminiferan Dictyoconus walnutensis		Cobán D	Cobán B	Shallow water carbonates, sabkha, evaporite dominated.	Fourcade et al., 1999	Age determined by fossil record.
Actela	Section	89.4869	16.0355	Upper breccia Early Danian (eugubina Zone, Keller, 1988)	Sepur		Yellow, olive grey and red sandy marls. Iridium concetration of 3.5 ng/g.	0.6 m	Actelá breccia			Fourcade et al., 1999
C9 Bajucu		92.07	16.457	Upper Campanian-Maastrichtian	Angostura		Wackstone, packstone, floatstone with benthic forams	180 m	Sierra Madre		Platform	Michaud and Fourcade, 1989
C8 La Trinitaria		92.063	16.068	Upper Campanian-Maastrichtian	Angostura		Wackstone, packstone, floatstone with benthic forams	150 m	Sierra Madre		Platform	Michaud and Fourcade, 1989
C7 La Angostura		92.657	16.336	Upper Campanian-Maastrichtian	Angostura		Wackstone, packstone, floatstone with benthic forams	150 m	Sierra Madre		Platform	Michaud and Fourcade, 1989
C10 Oxchuc		92.287	16.872	Upper Campanian-Maastrichtian	Angostura		Dolomites and limestones, some clastic limestones horizons.	150 m	Sierra Madre		Platform	Michaud and Fourcade, 1989
C6 Julian Grajales		92.968	16.484	Upper Campanian-Maastrichtian	Jolpabuchil		Calcareous breccias and laminated limestones with chert nodules; Globotruncana fossils and reworked rudists fragments and bethic forams.	70 m	Sierra Madre		Slope; transition between Angostura platform and Tuxtla basin	Michaud and Fourcade, 1989
C5 R. Sto Domingo		93.02	16.46	Upper Campanian-Maastrichtian	Jolpabuchil		Limestones with chert nodules, Globotruncana	45 m			basin; Tuxtla basin	Michaud and Fourcade, 1989
C13 Tuxtla		93.117	16.8	Upper Campanian-Maastrichtian	Jolpabuchil		Limestones with chert nodules, Globotruncana	45 m			basin	Michaud and Fourcade, 1989
C12 Sumidero		93.053	16.754	Upper Campanian-Maastrichtian	Jolpabuchil		Limestones with chert nodules, Globotruncana	90 m	Sierra Madre		basin	Michaud and Fourcade, 1989
C11 Carretera San Cristobal		92.967	16.764	Upper Campanian-Maastrichtian	Jolpabuchil		Wackstone, packstone, floatstone with benthic forms; Limestones with chert nodules, Globotruncana	75 m	Sierra Madre		basin	Michaud and Fourcade, 1989
C5 R. Sto Domingo		93.02	16.46	Upper Campanian-Maastrichtian	Juan Crispin		Clastic limestones with crossbeds; 5 m calcareous breccias.	25 m		Angostura	External border of the carbonate platform.	Michaud and Fourcade, 1989
C14 Berriozabal		93.265	16.84	Upper Campanian-Maastrichtian	Juan Crispin		Clastic limestones, breccias	30 m			External border of the carbonate platform.	Michaud and Fourcade, 1989
C4 Guadalupe Victoria		93.11	16.533		Jolpabuchil		Limestones with chert nodules, Globotruncana	50 m	Ocozocuautla ?		basin	Michaud and Fourcade, 1989
C4 Guadalupe Victoria		93.11	16.533		Juan Crispin		Clastic limestones with crossbeds; rich in orbitoline	30m	Jolpabuchil	Angostura	External border of the carbonate platform.	Michaud and Fourcade, 1989
C3 Rio Suchiapa		93.1645	16.6221		Juan Crispin		Clastic limestones with crossbeds	100 m			External border of the carbonate platform.	Michaud and Fourcade, 1989
C13 Tuxtla		93.117	16.8	Upper Campanian-Maastrichtian	Juan Crispin		Clastic limestones with crossbeds	20 m			external platform	Michaud and Fourcade, 1989
C12 Sumidero		93.053	16.754	Upper Campanian-Maastrichtian	Juan Crispin		Clastic limestones with crossbeds, breccia	20 m			External border of the carbonate platform.	Michaud and Fourcade, 1989
C11 Carretera San Cristobal		92.967	16.764	Upper Campanian-Maastrichtian	Juan Crispin		Clastic limestones	20 m			External border of the carbonate platform.	Michaud and Fourcade, 1989
C2 Emiliano Zapata		93.212	16.676		Juan Crispin		Clastic limestone; floatstones and rich in bethic formas. Orbitoline	120 m	Ocozocuautla		External border of the carbonate platform.	Michaud and Fourcade, 1989
C3 Rio Suchiapa		93.1645	16.6221	Upper Campanian-Maastrichtian	Ocozocuautla		Marls	45 m				Michaud and Fourcade, 1989
C3 Rio Suchiapa		93.1645	16.6221	Upper Campanian-Maastrichtian	Ocozocuautla		Calcareous sandstones and rudists (CCSR)	15 m				Michaud and Fourcade, 1989
C2 Emiliano Zapata		93.212	16.676	Upper Campanian-Maastrichtian	Ocozocuautla		Marls	90 m				Michaud and Fourcade, 1989
C15 El Naranjo		93.331	16.81	Upper Campanian-Maastrichtian	Ocozocuautla	Cerebro	Breccias and sandstones	90 m			deltaic	Michaud and Fourcade, 1989
C15 El Naranjo		93.331	16.81	Upper Campanian-Maastrichtian	Ocozocuautla		Sandy marls with globotruncana	120 m			deltaic	Michaud and Fourcade, 1989
C15 El Naranjo		93.331	16.81	Upper Campanian-Maastrichtian	Ocozocuautla		Limestone with rudists	60 m		Angostura	Platform	Michaud and Fourcade, 1989
C14 Berriozabal		93.265	16.84	Upper Campanian-Maastrichtian	Ocozocuautla		Marls, calcareous sandstones with rudists	90 m			basin, outer pltform?	Michaud and Fourcade, 1989
C13 Tuxtla		93.117	16.8	Upper Campanian-Maastrichtian	Ocozocuautla		Sandy marls with globotruncana	30 m			basin	Michaud and Fourcade, 1989
C1 Ocozocuautla		93.366	16.781	Upper Campanian-Maastrichtian	Ocozocuautla	Cerebro	Conglomerates and sandstones	300 m	Sierra Madre		Deltaic	Michaud and Fourcade, 1989
C1 Ocozocuautla		93.366	16.781	Upper Campanian-Maastrichtian	Ocozocuautla		Sandy marls, Globotruncana; conglomerates issolated 5 m thick.	270 m			Deltaic	Michaud and Fourcade, 1989
C1 Ocozocuautla		93.366	16.781	Upper Campanian-Maastrichtian	Ocozocuautla		marls	40 m		Limestones thick Angostura	Deltaic	Michaud and Fourcade, 1989
C1 Ocozocuautla		93.366	16.781	Aptian-Cenomanian	Sierra Madre					Ocozocuautla Fm (El Cerebro)		Michaud and Fourcade, 1989
C5 R. Sto Domingo		93.02	16.46	Upper campanian	Suchiapa		Thick bioclastic limestones, with Fe-rich nodules and fragments of rudists.	7 m	Sierra Madre		Mark the basinal of the transported fe-rich nodules formed during the Turonian or Upper Cenomanian to Lower campanian hiatuses.	Michaud and Fourcade, 1989
C3 Rio Suchiapa		93.1645	16.6221	Upper campanian	Suchiapa		Thick bioclastic limestones, with Fe-rich nodules and fragments of rudists.	7 m				Michaud and Fourcade, 1989
C2 Emiliano Zapata		93.212	16.676	Upper campanian	Suchiapa		Thick bioclastic limestones, with Fe-rich nodules and fragments of rudists.	7 m	Sierra Madre	Ocozocuautla	Mark the basinal of the transported fe-rich nodules formed during the Turonian or Upper Cenomanian to Lower campanian hiatuses.	Michaud and Fourcade, 1989
C14 Berriozabal		93.265	16.84	Upper Campanian	Suchiapa		Thick bioclastic limestones, with Fe-rich nodules and fragments of rudists.	7 m			basin	Michaud and Fourcade, 1989
C13 Tuxtla		93.117	16.8	Upper Campanian	Suchiapa		Thick bioclastic limestones, with Fe-rich nodules and fragments of rudists.	10 m	Sierra Madre		basin	Michaud and Fourcade, 1989
B Campur		90.035	15.424	Upper Campanian, Maastrichtian	Campur		Wackestone and packstone. Fragments of equinoderms, rudists, large forams. Sulcoperculina vermunti, Torreina torrei, Pseudorbitoides sp., Dicyclina schlumbergeri, Vaughanina cubensis, Orbitocyclina minima.	13 m			External platform	Michaud et al., 1992
B Campur		90.035	15.424	Uppermost Campanian	Campur		Green and pink limestone and marl. Wackestone and packstone. Rich in planktonic forams. Globotruncana calcarata.	20 m		Sepur	Basin (foreland)	Michaud et al., 1992
A Chemal		91.561	15.555	Upper Campanian, Maastrichtian	Campur (Ixcoy)		Bioclastic (rudists, large forams) limestone.	15 m			External platform	Michaud et al., 1992
A Chemal		91.561	15.555	Uppermost Campanian	Campur (Ixcoy)		Limestone wih chert nodules, some bioclastic. Contains calciturbidites.	20 m			Basin (foreland)	Michaud et al., 1992
B Campur		90.035	15.424	Maastrichtian	Sepur		Breccia. Fragments of platform limestones. Conglomerates with serpentinite and volcanic rocks.	50m			Basin (foreland)	Michaud et al., 1992
A Chemal		91.561	15.555	Maastrichtian	Sepur (Chemal)		Marls and mudstone interbedded with sandstone.	80 m			Basin (foreland)	Michaud et al., 1992
A Chemal		91.561	15.555	Maastrichtian	Sepur (Chemal)		Breccias	10 m			Basin (foreland)	Michaud et al., 1992
B Cobán		90.035	15.424	Aptian?	Cobán		Homogeneous and finely stratified dolomite	100's of m			Internal Platform	Michaud et al., 1992
B Cobán		90.035	15.424	Cenomanian	Cobán		Limestone rich in miliolida and rudist fragments	100's of m			Internal Platform	Michaud et al., 1992
Campur		90.035	15.424	Cenomanian-Santonian	Cobán (Top)		Light gray limestone, thick beds. Equinoderms, rudists, forams. Dicyclina schlumbergeri.	150 m				Michaud et al., 1992
A Chemal		91.561	15.555	Cenomanian	Cobán (Ixcoy)		Wackestones rich in miliolida. Pseudorhapydionina chiapanensis associated with Nummoloculina.	400 m			Internal Platform	Michaud et al., 1992
A Chemal		91.561	15.555	Santonian-Turonian?	Cobán (Ixcoy)		Calcareous breccias, and minor dolomite and fine interbeds of limestone bearing chert nodules	600 m				Michaud et al., 1992
A Chemal		91.561	15.555	Lower Aptian (base)	Cobán (lxcoy)		Homogeneous dolomites with Choffatella decipiens at base.	400 m			Internal Platform	Michaud et al., 1992
Oxchuc		92.287	16.872	Upper Albian	Sierra Madre	Cantelha	Dolomitic limestone with miliolds, thin bedded, stratiffied with benthonitic clays. Shale, wackestone-packstone, laminar limestones (algal mat) with recrystallized bioclasts. Nummoculina heimi	880 m	Cobán	erosional discordance, dolomitic breccias. Hiatus Cenomanian-Campanian	Near shelf	Quezada-Muñetón, 1987
Puxcatan		92.486	17.682	Albian Cenomanian	Sierra Madre	Cantelha	Wackstone-packstone with pellets, miliolids	50 m	unknown	Slope breccias with rudist fragments from the Turonian-Santonian	Platform	Quezada-Muñetón, 1987
Rio Macabil		93.8013	17.05	Albian to cenomanian	Sierra Madre	Cantelha	Laminated dolomites, wackestones with miliolids, algal mats (Coskinolina sp. and Dyctioconus sp.)	70 m	Malpaso (discordant)	erosional discordance, dolomitic breccias from Campanian-Maastrichtian (Xochitlan Fm.).	Platform	Quezada-Muñetón, 1987
Tapijulapa		92.782	17.335	Albian Cenomanian	Sierra Madre	Cantelha	Wackstone-packstone with pellets, miliolids	50 m	unknown	Jolpabuchil	Platform	Quezada-Muñetón, 1987
Puxcatan I		92.486	17.682	Turonian-Santonian	Sierra Madre	Jolbabuchil lower to middle	polimictic breccias, rudist packstones, planktonic wackstone-packstone	36 m	wackstone with pellets from Cantelha		Slope	Quezada-Muñetón, 1987	Platform equivalent in the western Sierra de Chiapas is the Cintalapa Fm.
Tapijulapa		92.782	17.335	Cenomanian-Campanian	Sierra Madre	Jolpabuchil	Thin bedded wackstone with planktonic foraminifera, ostracods and organic mater, nodular chert. Wackstne with flaser laminations, nodular chert, and bentonite. Marls with volcacnic clay, planktonic wackstones, nodular chert, ripples.	266 m	cantleha		Deep marine, basin	Quezada-Muñetón, 1987	Platform equivalent in the western Sierra de Chiapas is the Cintalapa Fm.
Puxcatan I		92.486	17.682	Campanian	Sierra Madre	Jolpabuchil Upper	Planktonic wackstone and nodular chert	50 m	Middle jolpabuchil		Deep marine, basin	Quezada-Muñetón, 1987	Platform equivalent in the western Sierra de Chiapas is the Cintalapa Fm.
Chacomá		92.2806	16.965	Maastrichtian	Angostura		Rudist packstones followed to the top by bioclastic packstone rich in globigerinoids	135 m	unknown	Tenejapa	Shallow and wide platform with reefal border.	Quezada-Muñetón, 1987
Chilil		92.335	16.732	Maastrichtian	Angostura		Crystalline dolomites, packstones with miliolids and alveolinids, packstone with intraclasts, miliolids, and planktonic microfauna, rudist-rich beds, algal mats, polimictic calcareous breccias, Chubbina Sp. And Alveolinids.	205 m	unknown	Soyaló	Shallow and wide platform with reefal border.	Quezada-Muñetón, 1987
Oxchuc		92.287	16.872	Maastrichtian	Angostura		miliolid and alveolinid packstone with algal lamination, calcareous breccia with rudist fragments, dolomitic limestone,	490 m	erosional discordance with Cantelha (Cenomanian-Campanian hiatus)	Lacandon	Shallow and wide platform with reefal border.	Quezada-Muñetón, 1987
Tojolabal Anticline		90.996	16.171	Maastrichtian	Angostura		Microfosil rich limestones	> 300 m	unknown	Normal with Lacandon		Quezada-Muñetón, 1987	Mexico-Guatemala border; near Montebello lakes.
Zaragoza-La soledad		91.819	16.334	Maastrichtian	Angostura		bioclastic packstone with miliolids, alveolinids, pellets and intraclasts. Abundant algal and rudsits fragments, burrows, algal mats, and dissication cracks.	390 m	unknown	Lacandon	Shallow and wide platform with reefal border.	Quezada-Muñetón, 1987
Oxchuc		92.287	16.872	Paleocene	Lacandón		Intraclast packstone with biogenic fragments, milliolids, dolomitized. Corals, algae, and bethic fauna as accesory fragments.	338 m			Platform	Quezada-Muñetón, 1987	Correlatable with Verapaz Group in Guatemala
Tojolabal Anticline		90.996	16.171	Paleocene-Lower Eocene	Lacandón		Intraclast packstone with biogenic fragments, milliolids, and ostracods. To the top intraclast packstone with planctonic fauna, coral and briozoa fragments.	590 m	Angostura	transicional with El Bosque.	West vergent platform. Outer platform (Tenejapa Fm.) to open sea (Soyalo Fm)	Quezada-Muñetón, 1987	Correlatable with Verapaz Group in Guatemala
Teapa I		92.968	17.434	Campanian-Maastrichtian	Mendez		Laminated marls, bentonitic, with planktonic fauna and breccias.	120 m	Transitional with Jolpabuchil	Normal with Nachital shale	Basin, open sea, proximal turbidites	Quezada-Muñetón, 1987
Tecpatan-Rio Totopac		93.2053	17.0831	Campanian (reworwed fauna)-Maastrichtian	Mendez		Laminated marls, greenish shale,	40 m	Transitional with Jolpabuchil	Normal with Nachital shale	Basin, open sea, proximal turbidites	Quezada-Muñetón, 1987	The campanian fauna is reworked. Depositional age is Maastrichitian
Puxcatan				Paleocene	Nanchital							Quezada-Muñetón, 1987
Rio Macabil				Paleocene	Nanchital							Quezada-Muñetón, 1987
Tapijulapa				Paleocene	Nanchital							Quezada-Muñetón, 1987
Teapa I y II				Paleocene	Nanchital							Quezada-Muñetón, 1987
Chilil		92.335	16.732	Lower Paleocene	Soyaló		Packstone of reworked milliolids and alveolinids, with rudist fragments; marls with plaktonic fauna; cm scale lamination; the top is made of calcareous shales, calcareous sandstones laminated in beds from 5 to 10 cm.	75 m	transitional with slope-breccias from upper Angostura		Slope, outer platform, open sea	Quezada-Muñetón, 1987	Correlatable with Nachital shale
Pacayal		91.316	16.184	Paleocene	Soyaló		Shales and sandstones, calcareous, fisiles, 2-5 cm scale beds,	473 m	Angostura	Transitional to El Bosque	Outer platform, open sea	Quezada-Muñetón, 1987	Correlatable with Nachital shale
Tzizcao		91.602	16.161	Paleocene	Soyaló		Calcareous breccias and shales. Breccias made of mm to cm scale clast derived from the platform.	280 m	transitional with slope-breccias from upper Angostura		Slope, outer platform, open sea	Quezada-Muñetón, 1987	Mexico-Guatemala border; eastern Comitán; Correlatable with Nachital shale
Chacomá		92.261	16.972	Lower to middle Paleocene	Tenejapa		Planktonic packstone, chert nodules, calcareous breccia, coarse packstones. Turbidites	102 m	Angostura	Transitional with Soyaló	Outer platform to slope	Quezada-Muñetón, 1987
Tenejapa		92.462	16.925	Lower to middle Paleocene	Tenejapa		Wackstone and packstone with reworked betonic fossil fragments, algae and coral. Chert nodules, calcareous breccias. Proximal and distal turbidites. To the top milliolids grainstones interbeded with greenish fisile shales with mica.	425 m	Angostura	Transitional with Soyaló	Outer platform to slope	Quezada-Muñetón, 1987
Comitán, SE, panamerican road		92.0478	16.2158	Campanian?-Maastrichtian	Xochitlan			1300 m		concordant with Soyaló	Slope	Quezada-Muñetón, 1987	in the panamericana highway, south Comitán. "Maastrichtian Jolpabuchil". But nearby Cros 1998 identify the beds as carboante with terrigenous influence.
Arroyo Pueblo Viejo					Xochitlan		Wackstone and packstone with marls and rudist packstones, microbreccias.	710 m	Discordant with miliolids dolomites (Cantelha)		Slope	Quezada-Muñetón, 1987
Bochil		92.88	16.93	Maastrichtian	Xochitlan		bioclastic packstone, thin beds of brown shale.	?	normal with Jolpabuchil		Slope	Quezada-Muñetón, 1987
Puxcatán II		92.597	17.56		Xochitlan		Intraclast packstone with biogenic fragments, calcareous breccia with rudist fragments.	10 m			Slope	Quezada-Muñetón, 1987
Rio Macabil		93.8013	17.05	Campanian-Maastrictian (lower Paleocene?)	Xochitlan		calcareous breccias and marls, bioclastic packstones, marls interbeded with planktonic packstones (campanian-Maastrichtina), packstones with rudists and moluscs intraclasts and igneous rocks extraclasts, shales and marls, calcareous breccias with igneous, rudists, planktonic wackstones, and marls fragments; calcareous shales and marls.	750 m	Discordant with miliolids dolomites (Cantelha)	Normal with Nachital shale	Slope	Quezada-Muñetón, 1987
Soyacal		93	17	Maastrichtian	Xochitlan		Brown shale with planktonic fauna with pyrite remplacement, calcareous breccia with platform fragments, wackstone and packstone with moluscas, red algae fragments and planktonic matrix.	480 m	normal with Jolpabuchil	concordant with Soyaló	Slope	Quezada-Muñetón, 1987	Location is not precise
Tumbalá		92.24	17.27	Maastrichtian	Xochitlan		Marly limestone, green-gray shale, calcareous breccias.	340 m	Jolpabuchil	Méndez	Slope	Quezada-Muñetón, 1987

## Sheet: Chap. info
This supplemental material accompanies Martens, U.C., and Sierra Rojas, M.I., 2021,
Late Cretaceous–Paleocene transition from calcareous platform to basinal deposition in
western Chiapas, Mexico: Opening of the Chiapanecan embayment, in Martens, U.C., and
Molina Garza, R.S., eds., Southern and Central Mexico: Basement Framework, Tectonic
Evolution, and Provenance of Mesozoic–Cenozoic Basins: Geological Society of America
Special Paper 546, https://doi.org/10.1130/2021.2546(07).
